# Supplementary material
Source: PubMed Central journal article supplement (PMC7456230)
Supplement: jci-130-138179-s399.pdf [file jci-130-138179-s399.pdf]

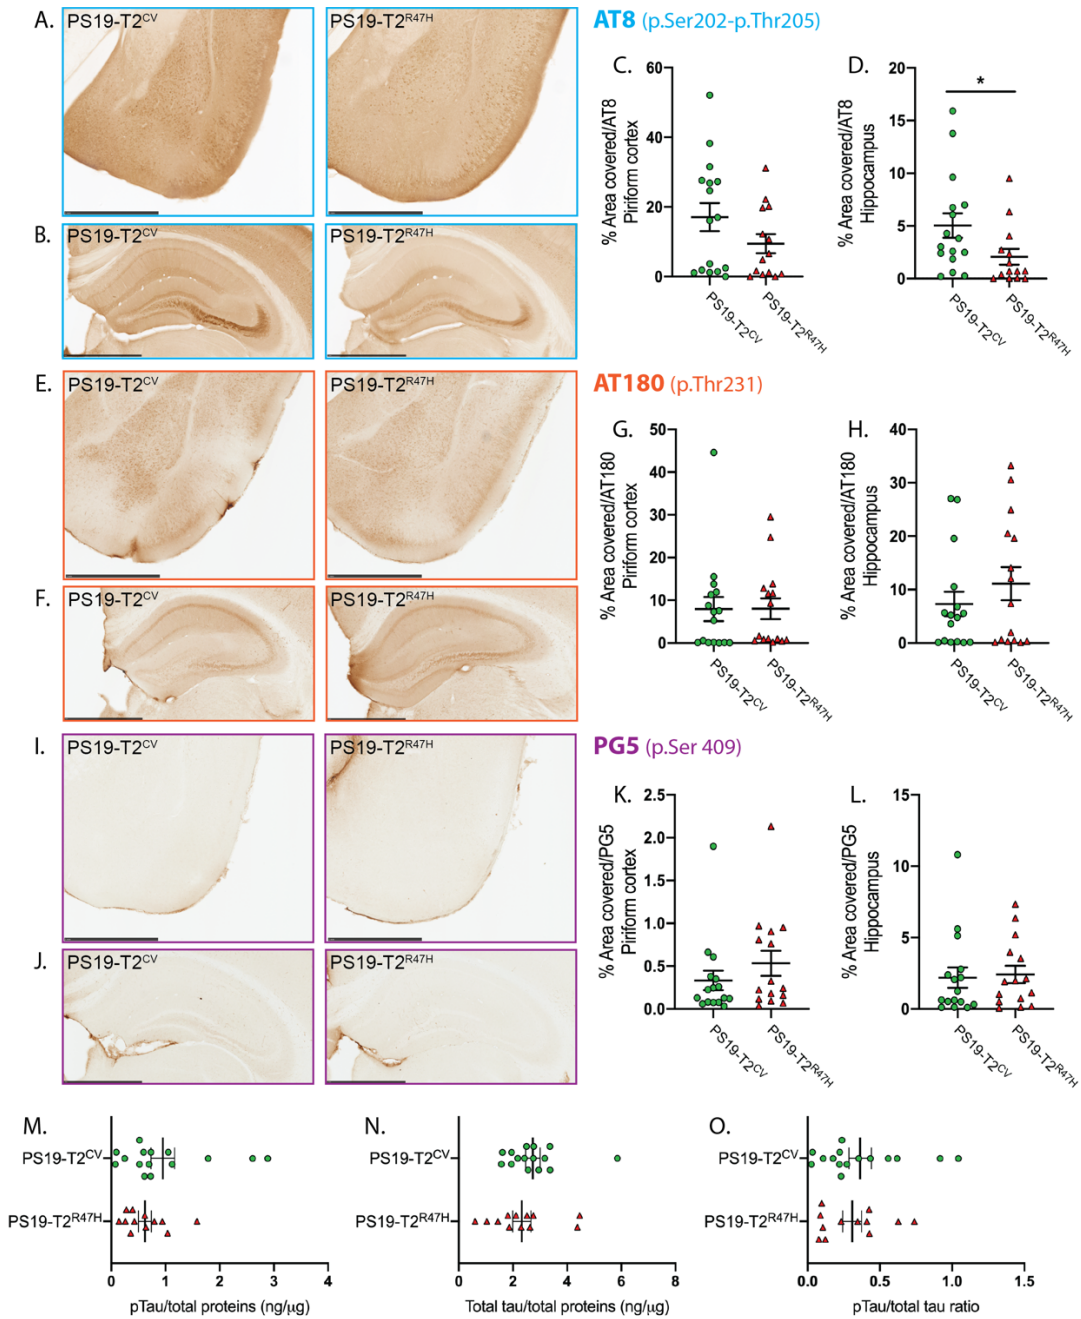

**Figure S1: Impact of R47H variant of TREM2 on tau pathology in 3-month-old PS19 mice.** Representative images of pTau staining (AT8, AT180 and PG5) in the piriform cortex (A, E, I) and hippocampus (B, F, J) from PS19-T2<sup>CV</sup> and PS19-T2<sup>R47H</sup> mice. (Scale bars: 1 mm). Quantification of the percent area covered by pTau staining (AT8, AT180 and PG5) in the piriform cortex (C, G, K) and hippocampus (D, H, L). Data are presented as mean  $\pm$  SEM. Significance was determined using an unpaired, two-tailed Mann Whitney's test due to the nonparametric data set. Significance was defined as  $*p < 0.05$  (PS19-T2<sup>CV</sup>,  $n=16$  and PS19-T2<sup>R47H</sup>  $n=14/15$ ). ELISA results showing concentrations of pTau (p.Ser202-Thr205 and p.Thr181) and total tau and pTau/total tau ratio in the hippocampus were quantified using a human-tau (htau) specific sandwich ELISA to measure pTau (L), total tau (M) and pTau/total tau ratio (L). pTau and total tau (L and M) were normalized on total protein concentration. Data are presented as mean  $\pm$  SEM. Significance was determined by an unpaired, two-tailed Student's t test (PS19-T2<sup>CV</sup>,  $n=15$  and PS19-T2<sup>R47H</sup>  $n=12$ ).

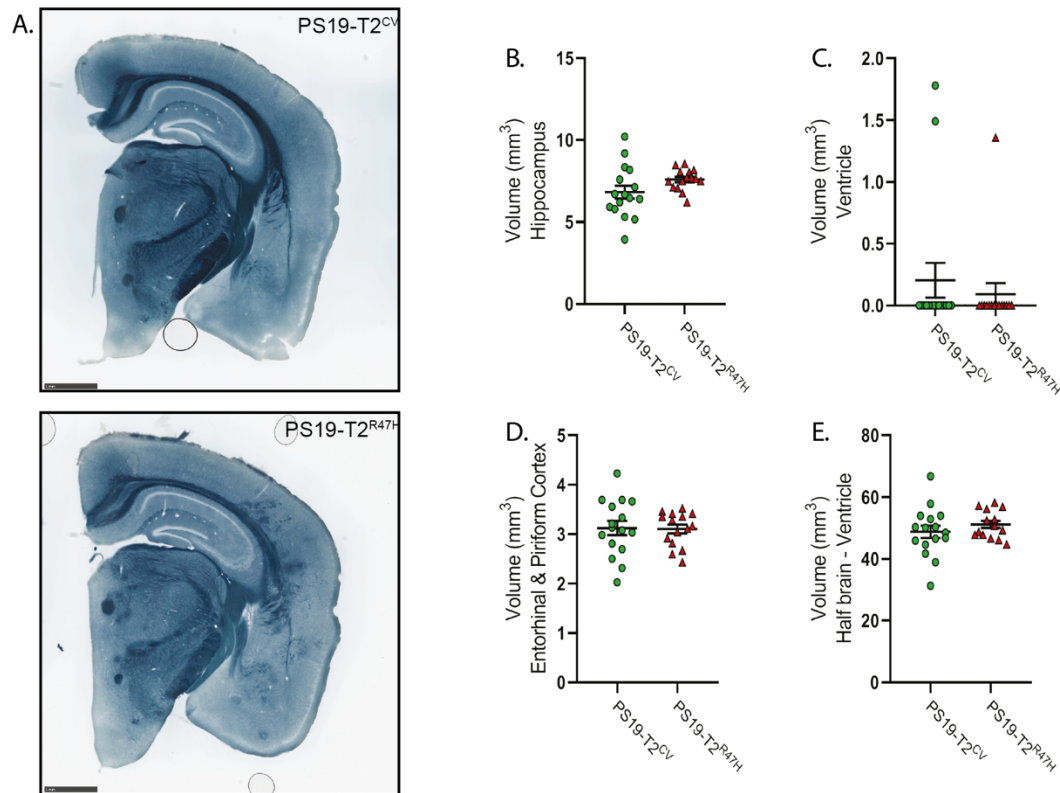

**Figure S2: Impact of R47H variant of TREM2 on brain volume in 3-month-old PS19 mice.** Representative images of PS19-T2<sup>CV</sup> and PS19-T2<sup>R47H</sup> brain sections stained with Sudan black at 3 months of age (A) (Scale bars, 1 mm). Quantification of the average volume of the hippocampus (B), ventricles (C), entorhinal and piriform cortex (D) and half brain minus ventricle (E). Data are presented as mean  $\pm$  SEM. Significance was determined by an unpaired, two-tailed Student's t test (PS19-T2<sup>CV</sup>, n=16 and PS19-T2<sup>R47H</sup> n=15).

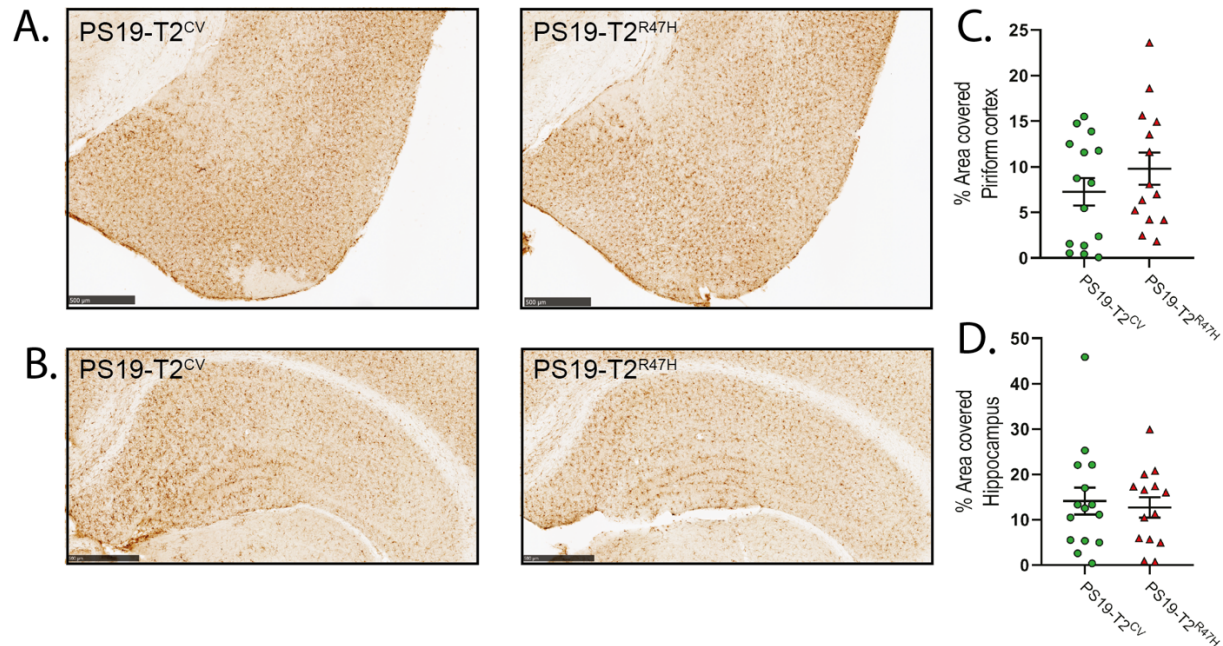

**Figure S3: Impact of R47H variant of TREM2 on microgliosis in 3-month-old PS19 mice.** Representative images of Iba1 staining in the piriform cortex (A) and hippocampus (B) from PS19-T2<sup>CV</sup> and PS19-T2<sup>R47H</sup> mice. (Scale bars: 0.5 mm). Quantification of the percent area covered by Iba1 staining in the piriform cortex (C) and hippocampus (D). Data is presented as mean  $\pm$  SEM. Significance was determined using an unpaired, two-tailed Mann Whitney's test due to the nonparametric data set (PS19-T2<sup>CV</sup>, n=15 and PS19-T2<sup>R47H</sup> n=14).

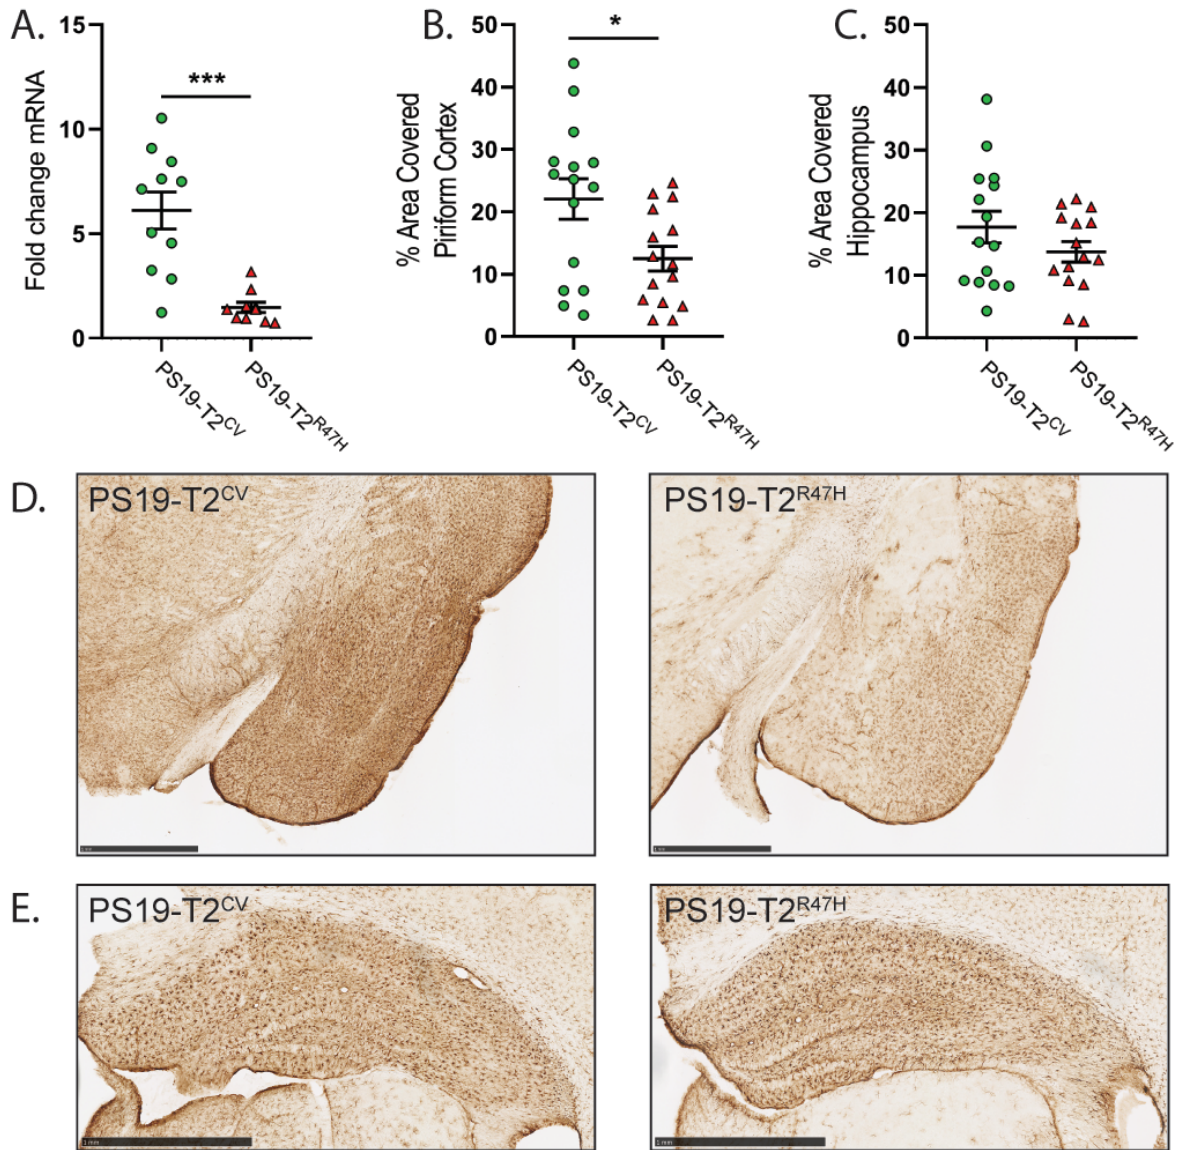

**Figure S4: R47H variant of TREM2 decreases astroglialosis in 9-month-old PS19 mice.** Expression of cortical GFAP mRNA of 9-month-old PS19-T2<sup>CV</sup> and PS19-T2<sup>R47H</sup> mice (A) (PS19-T2<sup>CV</sup>, n=11 and PS19-T2<sup>R47H</sup> n=10). Quantification of the percent area covered by GFAP staining in the piriform cortex (B) and hippocampus (C) (PS19-T2<sup>CV</sup>, n=15 and PS19-T2<sup>R47H</sup> n=15). Representative images of GFAP staining in the piriform cortex (D) and hippocampus (E) from PS19-T2<sup>CV</sup> and PS19-T2<sup>R47H</sup> mice (Scale bars: 1 mm). Data are presented as mean  $\pm$  SEM. Significance was determined by an unpaired, two-tailed Student's t test. Significance was defined as \* $p$  < 0.05 and \*\*\* $p$  < 0.001

| TREM2 genotype | APOE genotype | Age     | Sex | CDR | Braak |
|----------------|---------------|---------|-----|-----|-------|
| CV             | 23            | 91.081  | M   | 3   | V     |
| CV             | 34            | 81.259  | F   | 3   | VI    |
| CV             | 44            | 72.203  | M   | 3   | VI    |
| CV             | 24            | 88.764  | F   | 3   | VI    |
| CV             | 33            | 90.2642 | F   | 2   | VI    |
| CV             | 33            | 80.975  | M   | 3   | VI    |
| CV             | 33            | 95.734  | F   | 3   | VI    |
| CV             | 34            | 84.471  | F   | 1   | III   |
| CV             | 33            | 91.165  | M   | 1   | III   |
| R47H           | 33            | 90.642  | M   | 3   | V     |
| R47H           | 34            | 88.225  | F   | 3   | IV    |
| R47H           | 33            | 85.637  | M   | 3   | V     |
| R47H           | 33            | 93.985  | F   | 3   | NA    |
| R47H           | 34            | 78.231  | M   | 3   | V     |
| R62H           | 34            | 77.714  | M   | 3   | V     |
| R62H           | 34            | 78.981  | F   | 3   | NA    |
| R62H           | 33            | 84.375  | F   | 3   | VI    |
| R62H           | 34            | 89.306  | F   | 3   | VI    |
| R62H           | 44            | 89.369  | F   | 3   | NA    |

**Supplementary Table 1.** Demographic information for TREM2<sup>R47H</sup>, TREM2<sup>R62H</sup>, and TREM2<sup>CV</sup> AD cases used in figure 7. NA: Not Available.
